# Supplementary material
Source: Elsevier journal article supplement (https://www.sciencedirect.com/science/article/pii/S1575181318302535)
Supplement: mmc1 [file S1575181318302535:mmc1.pdf]

MATERIAL SUPLEMENTARIO

En el material suplementario se muestran los gráficos con la distribución porcentual de respuestas según carrera.

El **gráfico 1**, muestra la distribución porcentual de respuestas, en función de si la metodología relacionada con la elaboración de maquetas, determinó un rol más activo para el desarrollo de aprendizajes significativos. La carrera de Nutrición y Dietética obtiene un 75% para la opción “Muy de acuerdo” de la escala y la carrera de medicina un 33,3% para la opción “Muy de acuerdo”.

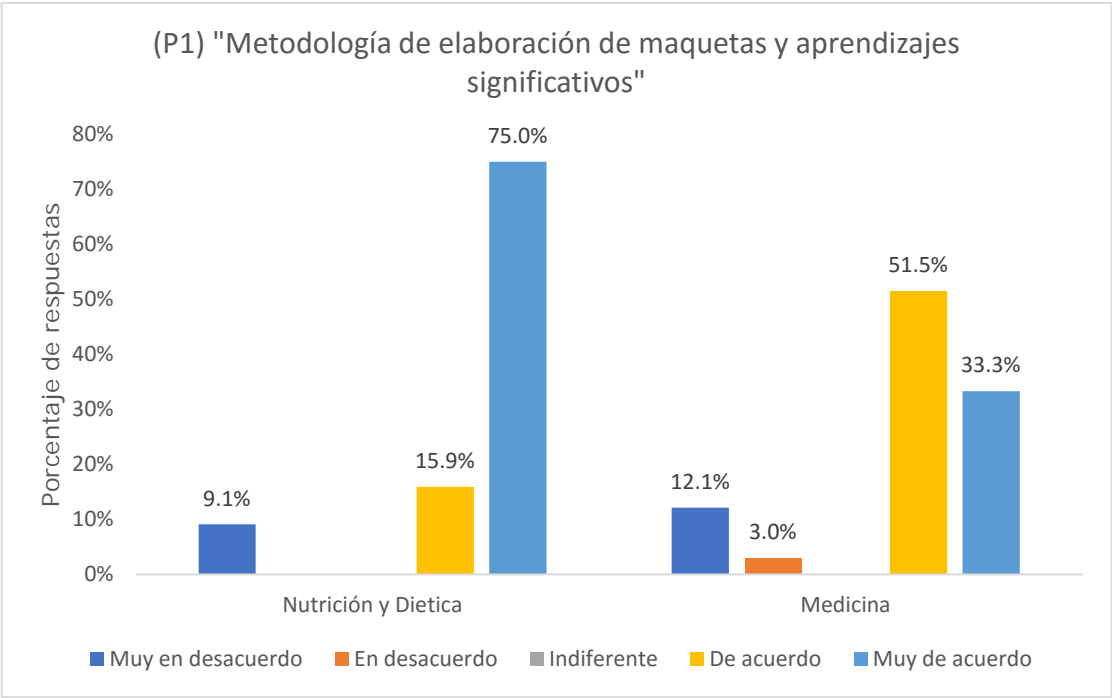

**Gráfico 1.** Metodología de elaboración de maquetas y aprendizajes significativos

El **gráfico 2** muestra la distribución porcentual de respuestas, en función de si el desarrollo de la metodología de construcción de maquetas permitió que lograra integrar de mejor manera los aprendizajes. La carrera de Nutrición y Dietética obtiene un 75% para la opción “Muy de acuerdo” y la carrera de medicina un 33,3% para “Muy de acuerdo”.

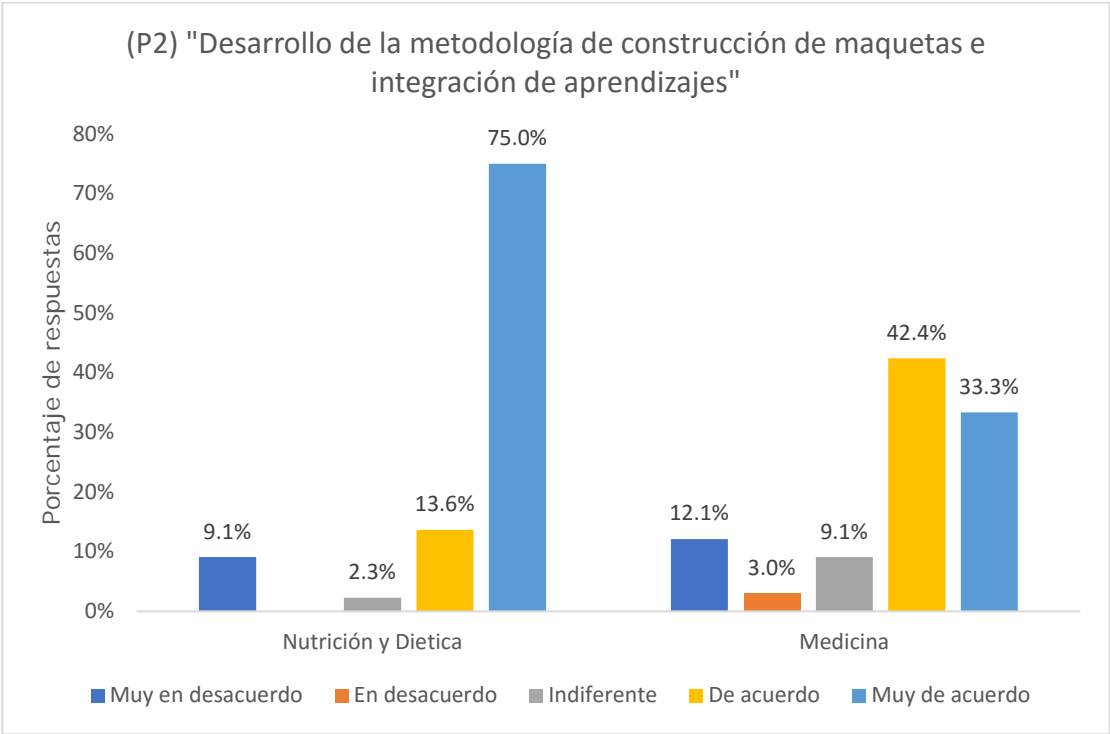

**Gráfico 2.** Desarrollo de la metodología de construcción de maquetas e integración de aprendizajes.

El **gráfico 3** muestra la distribución porcentual de respuestas, en función de si la metodología relacionada con la elaboración de maquetas me permitió obtener mayor claridad en el aprendizaje de conceptos y procesos fisiológicos abstractos. La carrera de Nutrición y Dietética obtiene un 75% para la opción “Muy de acuerdo” y la carrera de medicina un 45,5% para dicha opción.

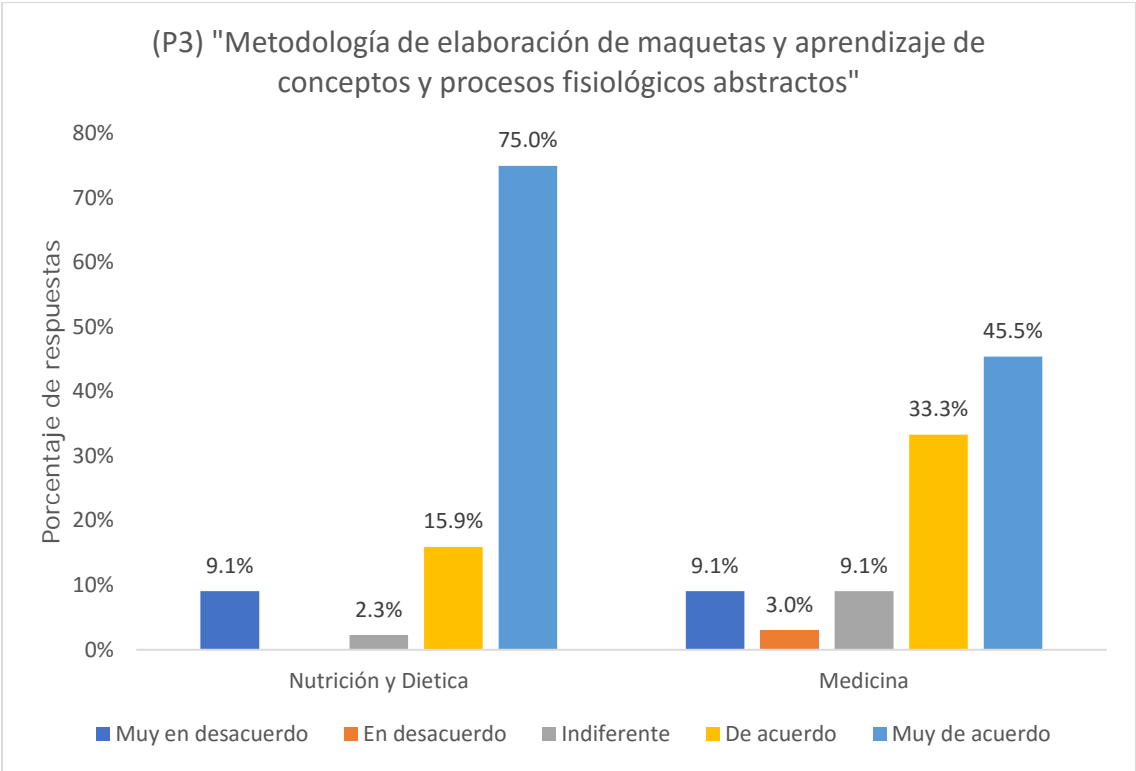

**Gráfico 3.** Metodología de elaboración de maquetas y aprendizaje de conceptos y procesos fisiológicos abstractos.

El **gráfico 4** muestra la distribución porcentual de respuestas, en relación a si el profesor orientó de manera activa la metodología de elaboración de maquetas. La carrera de Nutrición y Dietética obtiene un 63,3% para la opción “Muy de acuerdo” y la carrera de medicina un 27,3% para dicha opción.

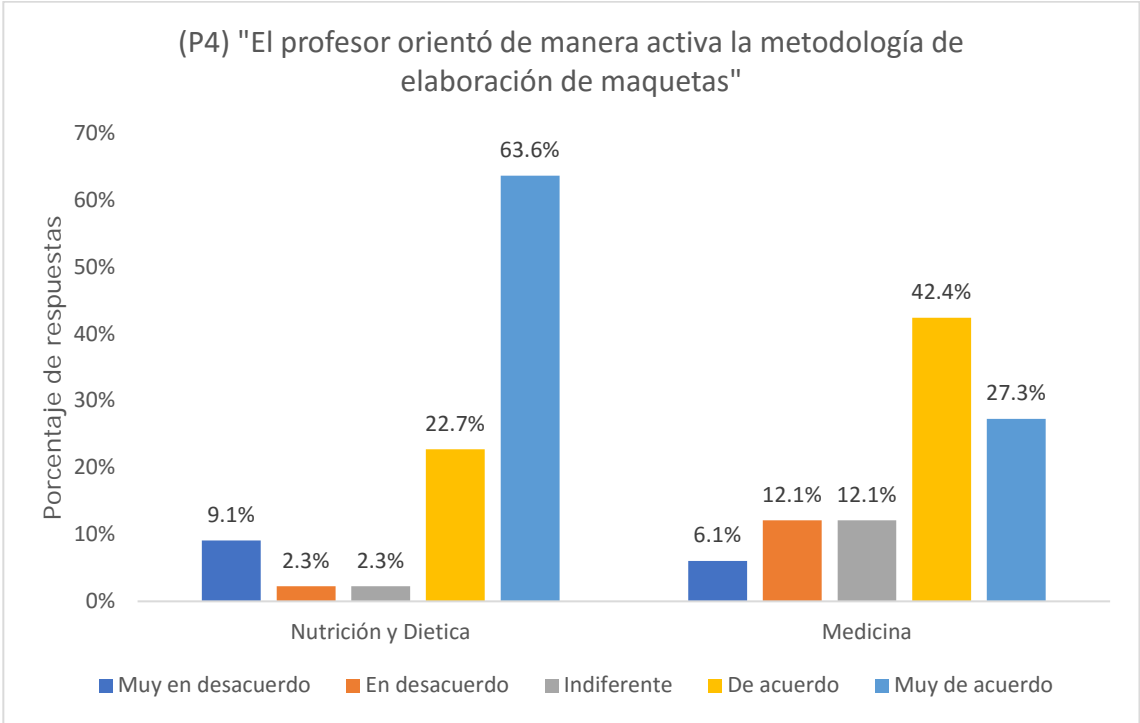

**Gráfico 4.** El profesor orientó de manera activa la metodología de elaboración de maquetas

El **gráfico 5** muestra la distribución porcentual de respuestas, en relación a la metodología de elaboración de maquetas, permitió mejorar de manera autónoma el proceso de aprendizaje. La carrera de Nutrición y Dietética obtiene un 72,7% la opción “Muy de acuerdo” y la carrera de medicina un 30,3% para dicha opción.

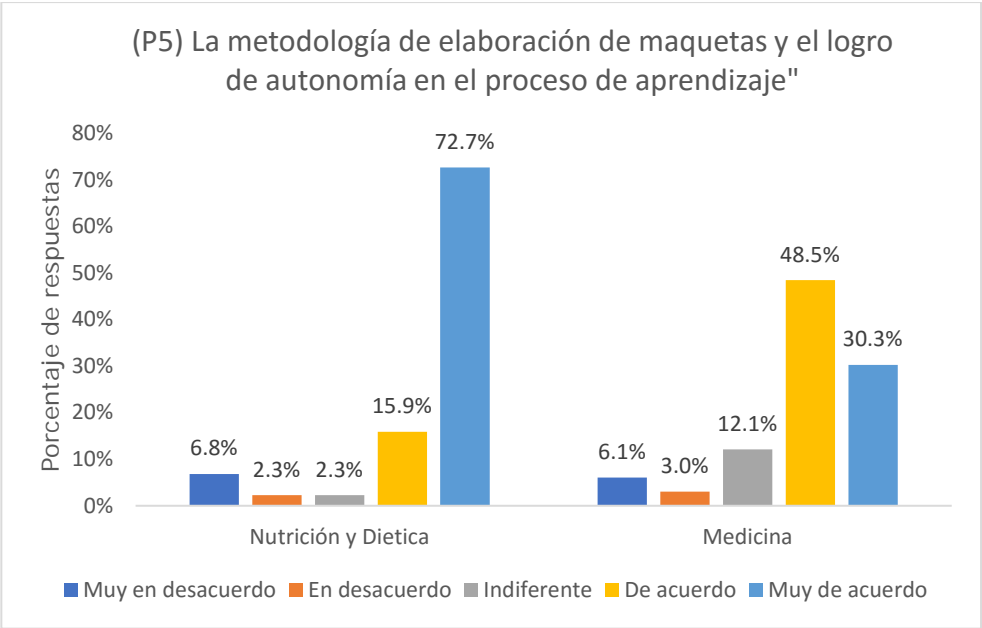

**Gráfico 5.** La metodología de elaboración de maquetas y el logro de autonomía en el proceso de aprendizaje

El **gráfico 6** muestra la distribución porcentual de respuestas en relación al desarrollo de la maqueta, facilitó el trabajo en equipo. La carrera de Nutrición y Dietética obtiene un 56,8% para la opción “Muy de acuerdo” y la carrera de medicina un 27,3% para dicha opción.

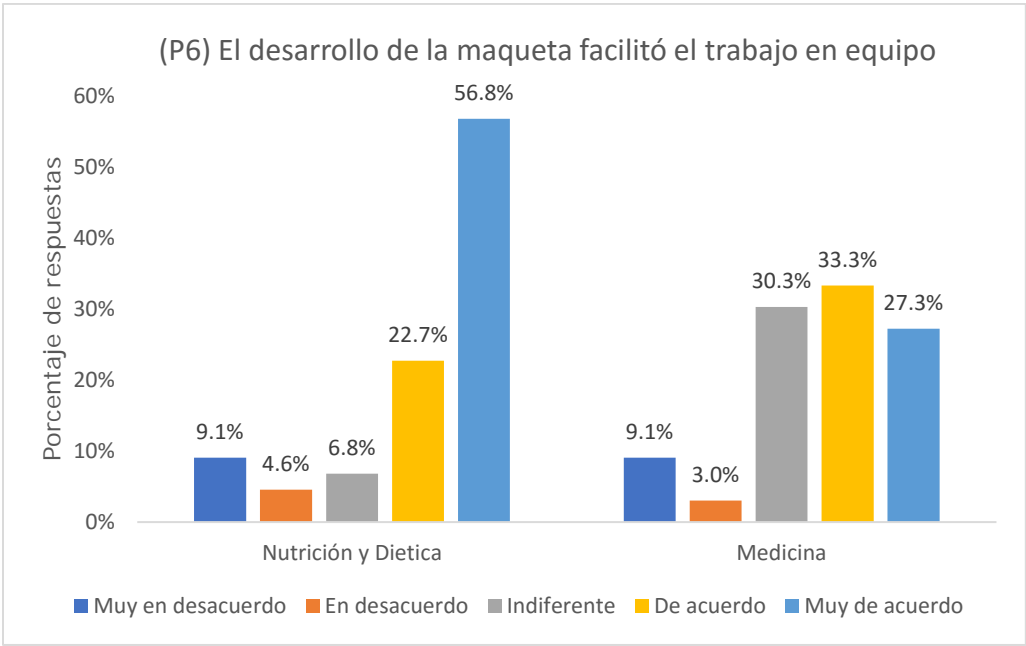

**Gráfico 6.** El desarrollo de la maqueta facilitó el trabajo en equipo

El **gráfico 7** muestra la distribución porcentual de respuestas en relación a los criterios de evaluación del proceso de elaboración de las maquetas fueron claros desde un principio. La carrera de Nutrición y Dietética obtiene un 70,5% para la opción “Muy de acuerdo” y la carrera de medicina un 56,3% para dicha opción.

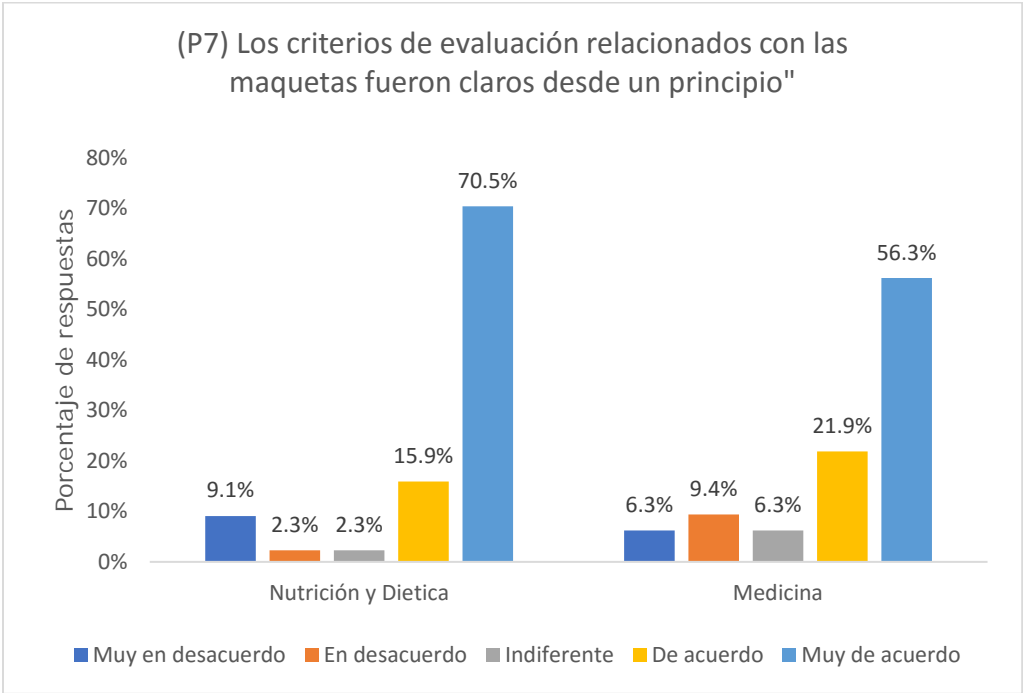

**Gráfico 7.** Los criterios de evaluación relacionados con las maquetas fueron claros desde un principio.

El **gráfico 8** muestra la distribución porcentual de respuestas, respecto de La forma de evaluar el proceso de elaboración de las maquetas, permitió evidenciar realmente lo que aprendí. La carrera de Nutrición y Dietética obtiene un 65,9% Muy de acuerdo y la carrera de medicina un 33,3% para la opción “Muy de acuerdo”.

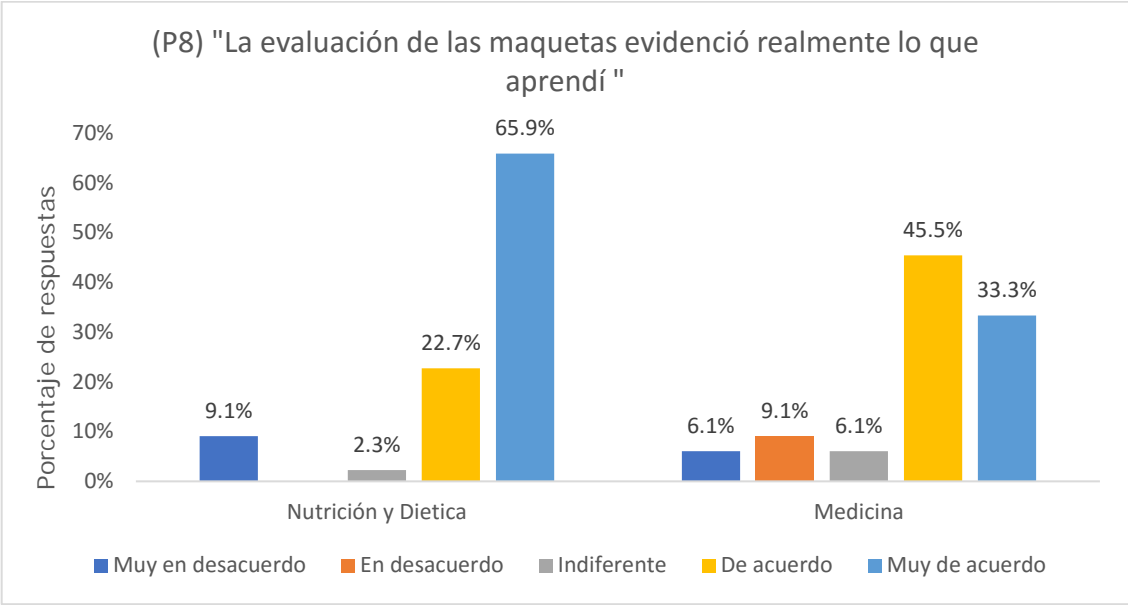

**Gráfico 8.** La evaluación de maquetas evidenció realmente lo que aprendí.

De acuerdo con los resultados obtenidos, se puede apreciar que existen diferencias porcentuales entre ambos grupos de estudio, mostrando una mayor correspondencia de la opción “Muy de acuerdo” en los estudiantes de Nutrición y Dietética comparativamente con los estudiantes de medicina en la mayoría de los ítems. Lo anterior queda reflejado en el siguiente **gráfico número 9** en donde se establece una comparación de comparación de tendencia entre las dos carreras mencionadas, y que considera el promedio ponderado para cada reactivo o ítem (indicados desde las preguntas p1 a p8)



El **gráfico 9** presenta la distribución de respuestas para cada uno de los 8 reactivos de la encuesta. Se advierte que la pregunta 7 (P7), (“Los criterios de evaluación del proceso de elaboración de las maquetas fueron claros desde un principio”) presentó la mayor cercanía entre las dos carreras evaluadas. Es importante tener en cuenta que el volumen de estudiantes es diferente en cada carrera.

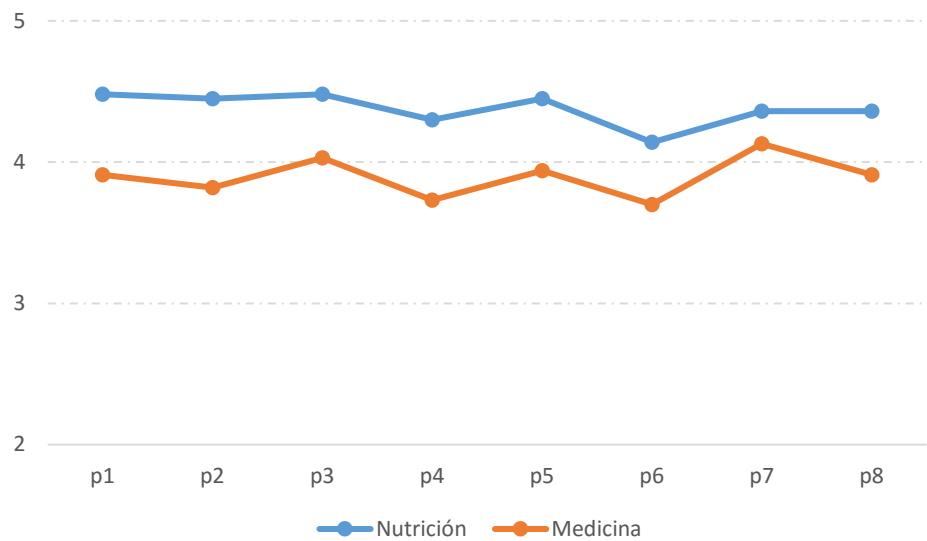

**Gráfico 9.** Comparación de tendencias entre las carreras de Nutrición y Dietética y Medicina

De acuerdo al gráfico anterior (gráfico 9). para los estudiantes de Nutrición y dietética la tendencia de respuestas es «muy favorable» en todos los reactivos, ya que la metodología de maquetas les ayuda a desarrollar el trabajo en equipo de mejor manera, favoreciendo la integración de los conocimientos a sus aprendizajes y consiguiendo una mejor evaluación de los resultados. En relación con la carrera de Medicina se observa que la actitud es favorable hacia gran parte de los reactivos. Sin embargo, existen instancias en donde los estudiantes manifiestan desacuerdo hacia los reactivos. Esto hace que la tendencia de respuesta sea solo «favorable».
